# Supplementary material for: Proactive community case management and child survival in periurban Mali
Source: PubMed Central journal article supplement — BMJ Glob Health. 2018 Mar 12;3(2):e000634. doi: 10.1136/bmjgh-2017-000634 (PMC5873643; doi:10.1136/bmjgh-2017-000634), 2018-03-12
Supplement: bmjgh-2017-000634supp002.pdf [file bmjgh-2017-000634supp002.pdf]

**Supplemental Table 1a:** Demographic and Socioeconomic Characteristics, 2008 to 2015 (continuous variables)

| Medians' Comparison, Kruskal Wallis –test                    |      |      |         |                 |        |                                               |                               |                                    |
|--------------------------------------------------------------|------|------|---------|-----------------|--------|-----------------------------------------------|-------------------------------|------------------------------------|
| Variable                                                     | Year | N    | Missing | Mean (min, max) | Std    | Median (25 <sup>th</sup> , 75 <sup>th</sup> ) | Baseline2008 Chi2 (Adj p-val) | Overall 2008 to 2015 Chi2, (p-val) |
| <b>Household Size</b>                                        | 2008 | 175  | 207     | 5.5 (2, 16)     | 2.858  | 5 (3, 6)                                      | Ref                           | 55.151 (0.000)                     |
|                                                              | 2009 | 341  | 0       | 5.6 (1, 20)     | 2.625  | 5 (4, 7)                                      | 1.732 (1.000)                 |                                    |
|                                                              | 2010 | 400  | 0       | 5.2 (1, 20)     | 2.397  | 5 (4, 6)                                      | 0.200 (1.000)                 |                                    |
|                                                              | 2011 | 1071 | 4       | 5.5 (1, 22)     | 2.885  | 5 (4, 7)                                      | 0.672 (1.000)                 |                                    |
|                                                              | 2012 | 1144 | 11      | 5.6 (1, 45)     | 3.120  | 5 (4, 7)                                      | 0.438 (1.000)                 |                                    |
|                                                              | 2013 | 1080 | 7       | 5.4 (1, 23)     | 2.655  | 5 (4, 7)                                      | 0.656 (1.000)                 |                                    |
|                                                              | 2014 | 1199 | 0       | 4.8 (1, 18)     | 2.059  | 4 (3, 6)                                      | 4.580 (0.906)                 |                                    |
|                                                              | 2015 | 1186 | 5       | 5.4 (1, 22)     | 2.834  | 5 (3, 6)                                      | 0.082 (1.000)                 |                                    |
| <b>Age</b>                                                   | 2008 | 379  | 3       | 30.6 (11, 80)   | 9.727  | 29 (24, 36)                                   | Ref                           | 25.168 (0.001)                     |
|                                                              | 2009 | 341  | 0       | 30.1 (15, 107)  | 10.724 | 28 (22, 35)                                   | 2.05 (1.000)                  |                                    |
|                                                              | 2010 | 399  | 1       | 28.6 (14, 58)   | 7.377  | 28 (23, 33)                                   | 6.34 (0.331)                  |                                    |
|                                                              | 2011 | 1052 | 23      | 29.8 (13, 66)   | 9.177  | 28 (23, 35)                                   | 3.34 (1.000)                  |                                    |
|                                                              | 2012 | 1142 | 13      | 30.6 (14, 77)   | 10.007 | 29 (23, 36)                                   | 0.21 (1.000)                  |                                    |
|                                                              | 2013 | 1083 | 4       | 29.8 (14, 62)   | 9.089  | 28 (23, 35)                                   | 2.01 (1.000)                  |                                    |
|                                                              | 2014 | 1199 | 0       | 30.7 (12, 76)   | 9.272  | 29 (24, 35)                                   | 0.20 (1.000)                  |                                    |
|                                                              | 2015 | 1185 | 6       | 30.8 (15, 75)   | 9.670  | 29 (24, 35)                                   | 0.02 (1.000)                  |                                    |
| <b>Completed grade level for women who attend any school</b> | 2008 | 191  | 5       | 7.5 (1, 17)     | 3.262  | 8 (5, 9)                                      | Ref                           | 67.23 (0.000)                      |
|                                                              | 2009 | 122  | 9       | 7.2 (1, 19)     | 3.454  | 7 (5, 9)                                      | 1.210 (1.000)                 |                                    |
|                                                              | 2010 | 159  | 0       | 6.2 (1, 17)     | 2.811  | 6 (4, 8)                                      | 13.279 (0.008)                |                                    |
|                                                              | 2011 | 498  | 12      | 6.5 (1, 16)     | 3.098  | 6 (4, 9)                                      | 15.047 (0.003)                |                                    |
|                                                              | 2012 | 500  | 21      | 7.3 (1, 22)     | 3.407  | 7 (5, 10)                                     | 0.736 (1.000)                 |                                    |
|                                                              | 2013 | 562  | 20      | 7.4 (1, 21)     | 3.542  | 7 (5, 9)                                      | 1.071 (1.000)                 |                                    |
|                                                              | 2014 | 651  | 9       | 7.9 (1, 23)     | 3.571  | 8 (5, 10)                                     | 0.748 (1.000)                 |                                    |
|                                                              | 2015 | 637  | 5       | 7.6 (1, 23)     | 3.453  | 7 (5, 9)                                      | 0.0007 (1.000)                |                                    |

**Supplemental Table 1b:** Demographic and Socioeconomic Characteristics, 2008 to 2015 (categorical variables)

Proportions' Comparison, Pearson  
Chi Square –test

| Variable                              | Year | N    | Missing | Count | Percent | Ref. 2008<br>Chi2 (p-val) | Overall<br>2008 to 2015<br>Chi2, (p-val) |
|---------------------------------------|------|------|---------|-------|---------|---------------------------|------------------------------------------|
| <b>Attend any<br/>school</b>          | 2008 | 382  | 0       | 196   | 51.13   | Ref                       | 71.91 (0.000)                            |
|                                       | 2009 | 341  | 3       | 131   | 38.60   | 11.4 (0.001)              |                                          |
|                                       | 2010 | 400  | 0       | 159   | 39.75   | 10.53 (0.001)             |                                          |
|                                       | 2011 | 1075 | 6       | 510   | 47.4    | 1.46 (0.227)              |                                          |
|                                       | 2012 | 1155 | 7       | 521   | 45.4    | 4.04 (0.044)              |                                          |
|                                       | 2013 | 1087 | 2       | 582   | 53.6    | 0.62 (0.432)              |                                          |
|                                       | 2014 | 1199 | 0       | 660   | 55.0    | 1.63 (0.202)              |                                          |
|                                       | 2015 | 1191 | 3       | 642   | 54.0    | 0.87 (0.352)              |                                          |
| <b>Married</b>                        | 2008 | 382  | 2       | 345   | 90.8    | Ref                       | 42.03 (0.000)                            |
|                                       | 2009 | 341  | 1       | 305   | 89.7    | 0.24 (0.624)              |                                          |
|                                       | 2010 | 400  | 1       | 372   | 93.2    | 1.59 (0.208)              |                                          |
|                                       | 2011 | 1075 | 3       | 955   | 89.1    | 0.87 (0.351)              |                                          |
|                                       | 2012 | 1155 | 3       | 1039  | 90.2    | 0.12 (0.732)              |                                          |
|                                       | 2013 | 1087 | 2       | 1004  | 92.5    | 1.18 (0.278)              |                                          |
|                                       | 2014 | 1199 | 0       | 1115  | 93.0    | 2.01 (0.156)              |                                          |
|                                       | 2015 | 1191 | 6       | 1025  | 86.5    | 4.86 (0.028)              |                                          |
| <b>Have nets<br/>in<br/>household</b> | 2008 | 382  | 1       | 280   | 73.3    | Ref                       | 184.82 (0.000)                           |
|                                       | 2009 | 341  | 7       | 267   | 78.3    | 4.12 (0.042)              |                                          |
|                                       | 2010 | 400  | 0       | 292   | 73.0    | 0.024 (0.877)             |                                          |
|                                       | 2011 | 1075 | 5       | 810   | 75.3    | 0.73 (0.391)              |                                          |
|                                       | 2012 | 1155 | 7       | 951   | 82.8    | 15.93 (0.000)             |                                          |
|                                       | 2013 | 1087 | 13      | 875   | 81.5    | 10.94 (0.001)             |                                          |
|                                       | 2014 | 1199 | 1       | 913   | 76.2    | 1.16 (0.282)              |                                          |
|                                       | 2015 | 1189 | 2       | 1108  | 93.2    | 109.23 (0.000)            |                                          |

There was no significant difference in the median age or household size of respondents at each year compared to 2008 as the reference. Ownership of at least one bed net in the household increased from 73% in 2008 to 93% in 2015 ( $p < 0.001$ ). There was significant difference in the marital status of female respondents only in 2015 compared to 2008; 2015 had fewer married women than 2008 ( $p < 0.05$ ). Fewer respondents attended school in 2009, 2010 and 2012 compared to 2008 ( $p < 0.05$ ). Among school attendees, the median completed grade was lower every year compared to 2008 except in 2014, but significantly different only in 2010 and 2011 ( $p < 0.01$ ).

**Supplemental Table 2:** Missing data patterns of the dataset

| <b>Data missing patterns by variable combination</b> | <b>Age at death</b> | <b>Dead</b> | <b>Birth month</b> | <b>Count</b> | <b>Percent</b> |
|------------------------------------------------------|---------------------|-------------|--------------------|--------------|----------------|
| <b>1</b>                                             | X                   | X           | X                  | 5826         | 85.45          |
| <b>2</b>                                             | X                   | X           | .                  | 946          | 13.88          |
| <b>3</b>                                             | .                   | X           | X                  | 38           | 0.56           |
| <b>4</b>                                             | .                   | X           | .                  | 3            | 0.04           |
| <b>5</b>                                             | .                   | .           | X                  | 4            | 0.06           |
| <b>6</b>                                             | .                   | .           | .                  | 1            | 0.01           |

The dot “.” symbol represents the missing information for the concerned variable and the “X” means the information is known.
